# Supplementary material
Source: MDPI journal article supplement (https://www.mdpi.com/2673-1924/2/3/37)
Supplement: s1 [file s1]

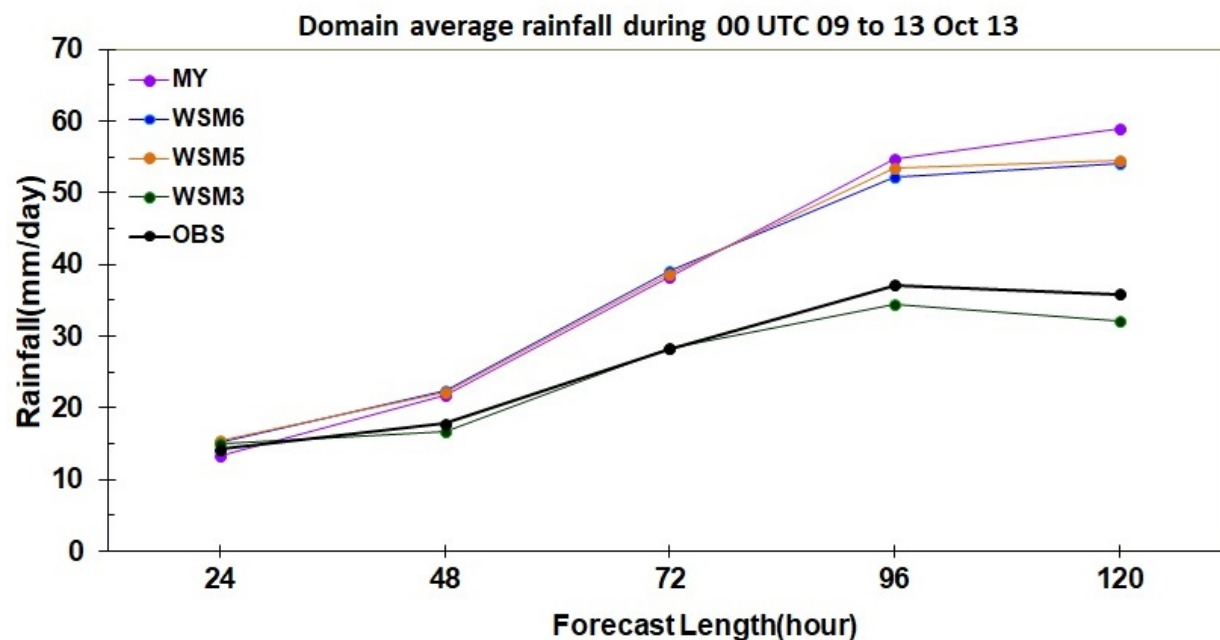

**Figure S1.** The time-series of simulated rainfall (mm.d<sup>-1</sup>) averaged over the domain (82° E -92° E and 13° N -23° N) derived from observation and MY, WSM6, WSM5 and WSM3 experiments during 24-, 48-, 72-, 96- and 120 hours).
